# Supplementary material for: The Effects of in Situ-Formed Silver Nanoparticles on the Electrical Properties of Epoxy Resin Filled with Silver Nanowires
Source: MDPI journal article supplement (doi:10.3390/polym8040157), 2016-04-21
Supplement: s1 [file s1]

# Supplementary Material: Effects of *in Situ* Formed Silver Nanoparticles on Electrical Properties of Epoxy Resin Filled with Silver Nanowire

Gwang-Seok Song, Dai-Soo Lee and Ilho Kang

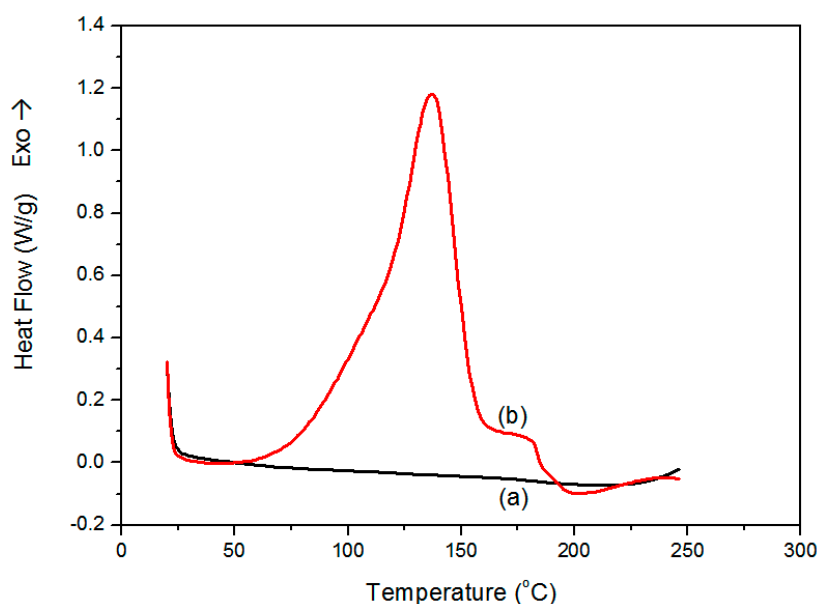

**Figure S1.** DSC thermograms obtained by scanning at heating rate of 10 °C/min in N<sub>2</sub> gas environment for the epoxy resins containing anhydride type curing agent: (a) without silver-imidazole complex; (b) with 10 wt % of the silver-imidazole complex. Exothermic heat of cure in (b) was 321.3 J/g.

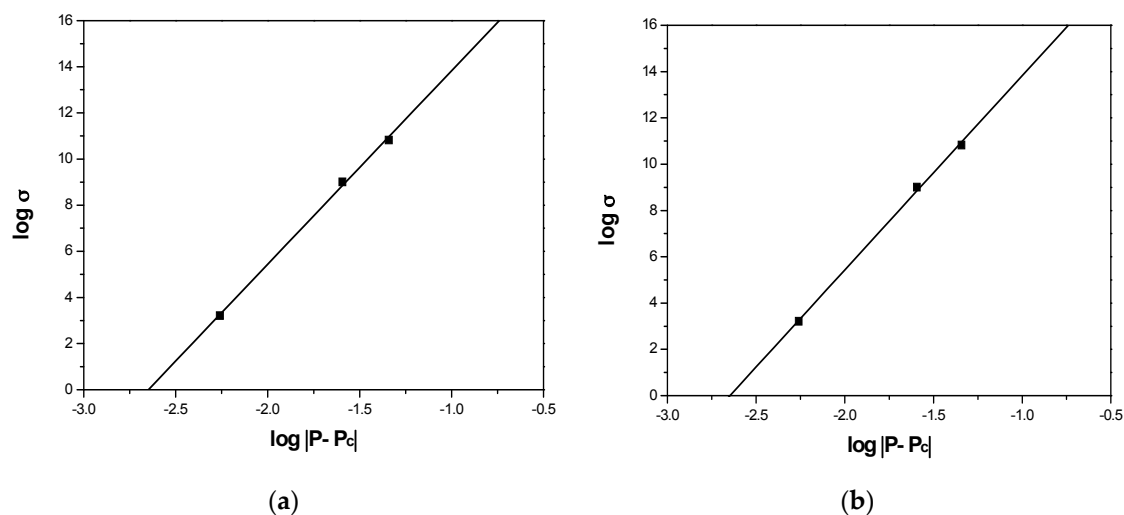

**Figure S2.** Cont.

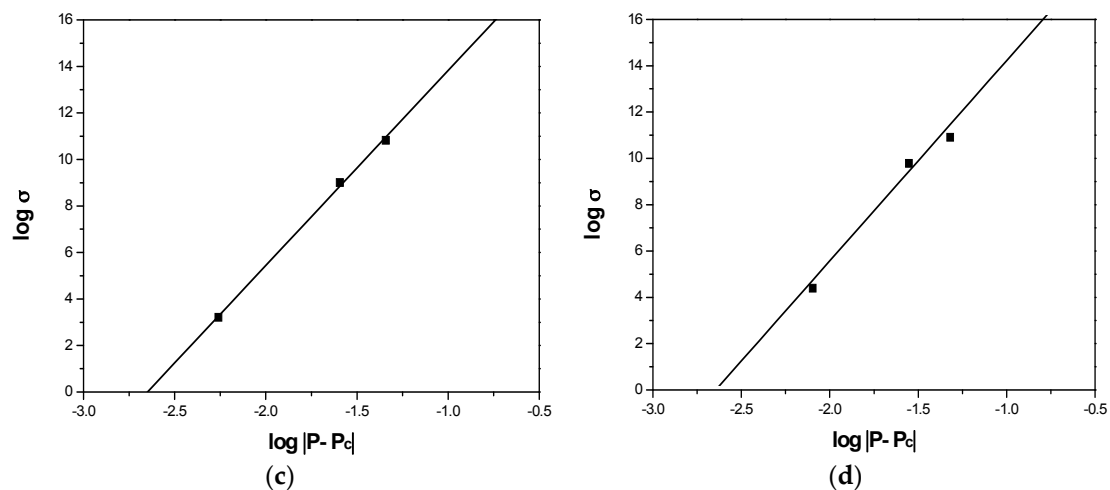

**Figure S2.** Fittings to the percolation model Equation (1) for surface electrical resistivity of the samples shown in Figure 4: (a) sample cured with imidazole in direction of the highest resistivity; (b) sample cured with imidazole in the direction perpendicular to that of (a); (c) sample cured with silver-imidazole complex in direction of the highest resistivity; (d) sample cured with silver-imidazole complex in the direction perpendicular to that of (c).

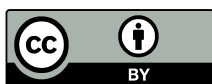

© 2016 by the authors; licensee MDPI, Basel, Switzerland. This article is an open access article distributed under the terms and conditions of the Creative Commons by Attribution (CC-BY) license (<http://creativecommons.org/licenses/by/4.0/>).
